# Supplementary material
Source: ML conference proceedings conference paper supplement (https://openaccess.thecvf.com/content/CVPR2026/html/Luo_Self-Corrected_Image_Generation_CVPR_2026_paper.html)
Supplement: Supplementary file 1 [file Luo_Self-Corrected_Image_Generation_CVPR_2026_supplemental.pdf]

# Self-Corrected Image Generation with Explainable Latent Rewards

## Supplementary Material

|     |                                                                                                                                              |          |  |     |
|-----|----------------------------------------------------------------------------------------------------------------------------------------------|----------|--|-----|
| 001 | <b>Contents</b>                                                                                                                              |          |  |     |
| 002 | <b>A Method Details</b>                                                                                                                      | <b>1</b> |  |     |
| 003 | A.1. Transformer-Based Corrector Architecture                                                                                                | 1        |  |     |
| 004 | A.2. Transformer-Based Latent Reward Projection                                                                                              | 1        |  |     |
| 005 | <b>B Additional Qualitative Results</b>                                                                                                      | <b>2</b> |  |     |
| 006 | B.1. Text-to-Image Generation                                                                                                                | 2        |  |     |
| 007 | B.2. Editing Tasks                                                                                                                           | 2        |  |     |
| 008 | <b>C Supervised Data Generation</b>                                                                                                          | <b>2</b> |  |     |
| 009 | <b>D Implementation and Reproducibility</b>                                                                                                  | <b>2</b> |  |     |
| 010 | D.1. Training Configuration                                                                                                                  | 2        |  |     |
| 011 | D.2. Hyperparameters                                                                                                                         | 2        |  |     |
| 012 | <b>E Additional Experiments</b>                                                                                                              | <b>2</b> |  |     |
| 013 | E.1. Process-Level Validation and Attribution                                                                                                | 2        |  |     |
| 014 | E.2. Sub-Reward Analysis and Ablation                                                                                                        | 6        |  |     |
| 015 | E.3. Comparison with Plug-and-Play Guidance                                                                                                  |          |  |     |
| 016 | Baseline                                                                                                                                     | 6        |  |     |
| 017 | E.4. Confidence-Based Modulation (CMD) Analysis                                                                                              | 6        |  |     |
| 018 | E.5. Additional Technical Details                                                                                                            | 6        |  |     |
| 019 | E.6. Runtime and Memory                                                                                                                      | 7        |  |     |
| 020 |                                                                                                                                              |          |  |     |
| 021 | <b>A. Method Details</b>                                                                                                                     |          |  |     |
| 022 | <b>A.1. Transformer-Based Corrector Architecture</b>                                                                                         |          |  |     |
| 023 | The Understanding-Guided Reinforcement Corrector                                                                                             |          |  |     |
| 024 | (URC) is implemented as a lightweight transformer that                                                                                       |          |  |     |
| 025 | operates on the latent feature grid of the frozen text-to-                                                                                   |          |  |     |
| 026 | image model. Given a latent representation $z_0 \in \mathbb{R}^{C \times H \times W}$                                                        |          |  |     |
| 027 | and the prompt embedding $e_p$ , URC predicts a residual                                                                                     |          |  |     |
| 028 | $\Delta_\theta(z_0, e_p)$ applied before decoding.                                                                                           |          |  |     |
| 029 | <b>Latent Tokenization.</b> We flatten the spatial dimensions                                                                                |          |  |     |
| 030 | and treat each spatial location as a token: $Z_0 =$                                                                                          |          |  |     |
| 031 | $\text{reshape}(z_0) \in \mathbb{R}^{(HW) \times C}$ . 2D sine-cosine positional en-                                                         |          |  |     |
| 032 | codings are added to retain spatial structure.                                                                                               |          |  |     |
| 033 | <b>Prompt Conditioning.</b> The prompt embedding $e_p \in \mathbb{R}^d$                                                                      |          |  |     |
| 034 | is projected to the latent dimension via $e'_p = W_p e_p$                                                                                    |          |  |     |
| 035 | and integrated using Feature-wise Linear Modulation (FiLM):                                                                                  |          |  |     |
| 036 | $Z'_0 = \gamma(e'_p) \odot Z_0 + \beta(e'_p),$                                                                                               |          |  |     |
| 037 | where $\gamma$ and $\beta$ are produced from $e'_p$ through small MLPs.                                                                      |          |  |     |
| 038 | This allows the transformer to modulate latent tokens ac-                                                                                    |          |  |     |
| 039 | cording to the semantic content of the prompt.                                                                                               |          |  |     |
|     | <b>Transformer Layers.</b> URC consists of six transformer                                                                                   |          |  | 040 |
|     | blocks, each containing multi-head self-attention with 8                                                                                     |          |  | 041 |
|     | heads, cross-attention to prompt tokens, feedforward net-                                                                                    |          |  | 042 |
|     | works (hidden size $4C$ ), and pre-norm residual connec-                                                                                     |          |  | 043 |
|     | tions. Cross-attention explicitly injects linguistic structure,                                                                              |          |  | 044 |
|     | including object categories, colors, and relational phrases.                                                                                 |          |  | 045 |
|     | <b>Residual Prediction.</b> The output of the transformer is                                                                                 |          |  | 046 |
|     | projected via a linear layer $W_o$ back to latent dimension-                                                                                 |          |  | 047 |
|     | ality, reshaped to form the residual:                                                                                                        |          |  | 048 |
|     | $\Delta_\theta(z_0, e_p) \in \mathbb{R}^{C \times H \times W}.$                                                                              |          |  | 049 |
|     | Despite its transformer architecture, URC remains compact                                                                                    |          |  | 050 |
|     | ( $\leq 15M$ parameters), ensuring it refines semantics without                                                                              |          |  | 051 |
|     | overpowering the frozen generator.                                                                                                           |          |  | 052 |
|     | <b>A.2. Transformer-Based Latent Reward Projection</b>                                                                                       |          |  | 053 |
|     | The latent reward projector $R_\phi$ is a transformer that maps                                                                              |          |  | 054 |
|     | corrected latent activations and prompt embeddings to in-                                                                                    |          |  | 055 |
|     | terpretable rewards approximating image-level feedback.                                                                                      |          |  | 056 |
|     | <b>Input Construction.</b> $R_\phi$ receives the corrected latent to-                                                                        |          |  | 057 |
|     | kens $Z_c \in \mathbb{R}^{(HW) \times C}$ , the prompt token embeddings $\{e_{p,i}\}$ ,                                                      |          |  | 058 |
|     | and the CMD-derived global semantic vector $g_{\text{cmd}} \in \mathbb{R}^d$ ,                                                               |          |  | 059 |
|     | which is appended as an extra token:                                                                                                         |          |  | 060 |
|     | $X_0 = [Z_c; e_{p,1}; \dots; e_{p,T}; g_{\text{cmd}}].$                                                                                      |          |  | 061 |
|     | <b>Transformer Design.</b> $R_\phi$ has four transformer layers                                                                              |          |  | 062 |
|     | with 8-head multi-head attention, alternating self-attention                                                                                 |          |  | 063 |
|     | and cross-attention, feedforward networks of size $4C$ , and                                                                                 |          |  | 064 |
|     | rotary positional embeddings for prompt tokens.                                                                                              |          |  | 065 |
|     | <b>Reward Heads.</b> After the transformer, the updated se-                                                                                  |          |  | 066 |
|     | matic token $g'_{\text{cmd}}$ is passed through three linear layers to                                                                       |          |  | 067 |
|     | produce the latent reward vector:                                                                                                            |          |  | 068 |
|     | $r_{\text{latent}} = [W_{\text{count}} g'_{\text{cmd}}, W_{\text{color}} g'_{\text{cmd}}, W_{\text{pos}} g'_{\text{cmd}}] \in \mathbb{R}^3,$ |          |  | 069 |
|     | corresponding to counting, color, and position sub-rewards.                                                                                  |          |  | 070 |
|     | <b>Training Objective.</b> The projector is trained to mini-                                                                                 |          |  | 071 |
|     | mize the L2 distance between predicted latent rewards and                                                                                    |          |  | 072 |
|     | image-level task-specific rewards:                                                                                                           |          |  | 073 |
|     | $\mathcal{L}_{\text{proj}} = \sum_{i=1}^3 \ r_{\text{latent}}^{(i)} - r_{\text{image}}^{(i)}\ _2^2,$                                         |          |  | 074 |
|     | enabling gradient-based optimization of URC even when                                                                                        |          |  | 075 |
|     | the original image-level reward is non-differentiable.                                                                                       |          |  | 076 |

|     |                                                                    |  |     |
|-----|--------------------------------------------------------------------|--|-----|
| 077 | <b>B. Additional Qualitative Results</b>                           |  |     |
| 078 | <b>B.1. Text-to-Image Generation</b>                               |  |     |
| 079 | Additional qualitative results for text-to-image generation        |  |     |
| 080 | using our model are shown in Fig.1. The prompts used for           |  |     |
| 081 | text-to-image generation, starting from top-left and going         |  |     |
| 082 | row-wise from left to right, are as follows:                       |  |     |
| 083 | 1. A person walking alone on a quiet street at sunset.             |  |     |
| 084 | 2. A bowl of fresh fruit sitting on a kitchen counter.             |  |     |
| 085 | 3. A dog lying on a couch in a cozy living room.                   |  |     |
| 086 | 4. A car parked beside a forest road in the morning.               |  |     |
| 087 | 5. A cup of coffee on a wooden table near a window.                |  |     |
| 088 | 6. A small boat floating on a calm lake at dawn.                   |  |     |
| 089 | 7. A cyclist riding through a city park.                           |  |     |
| 090 | 8. A marketplace stall filled with colorful vegetables.            |  |     |
| 091 | 9. A cat sitting on a windowsill looking outside.                  |  |     |
| 092 | 10. A person reading a book in a quiet café.                       |  |     |
| 093 | 11. A train passing through a snowy landscape.                     |  |     |
| 094 | 12. A street food vendor cooking at night.                         |  |     |
| 095 | <b>B.2. Editing Tasks</b>                                          |  |     |
| 096 | The prompts used to get results for the image editing task         |  |     |
| 097 | Figure 2 Figure 3 Figure 4, starting from the top-left and         |  |     |
| 098 | going row-wise from left to right, are as follows:                 |  |     |
| 099 | 1. Add a small backpack resting on the ground next to the          |  |     |
| 100 | bicycle.                                                           |  |     |
| 101 | 2. Add a small cushion under the cat.                              |  |     |
| 102 | 3. Turn the baker into a man.                                      |  |     |
| 103 | 4. Add a small cup next to the pitcher.                            |  |     |
| 104 | 5. Add a small dog walking next to the couple.                     |  |     |
| 105 | 6. Remove half the people from the image, from the cross-          |  |     |
| 106 | walk.                                                              |  |     |
| 107 | 7. Change the kite's color to bright red.                          |  |     |
| 108 | 8. Place a small cooler next to the fisherman, near his feet.      |  |     |
| 109 | 9. Add a line of people near the food truck.                       |  |     |
| 110 | 10. Add a straw to the glass.                                      |  |     |
| 111 | 11. Add an umbrella above the table.                               |  |     |
| 112 | 12. Add a plate of vegetables on the grill.                        |  |     |
| 113 | 13. Add a notebook next to the laptop.                             |  |     |
| 114 | 14. Add a small trail sign beside the path.                        |  |     |
| 115 | 15. Add a small seashell next to the sneakers.                     |  |     |
| 116 | 16. Add a distant mountain in the background scenery.              |  |     |
| 117 | 17. Add a small bench next to the bus stop.                        |  |     |
| 118 | 18. Add a single cloud in the sky above the mountain.              |  |     |
| 119 | 19. Add a small water bottle on the ground next to the per-        |  |     |
| 120 | son.                                                               |  |     |
| 121 | 20. Add a few blueberries on the plate beside the pancakes.        |  |     |
| 122 | 21. Add a folded blanket at the side of the bed.                   |  |     |
| 123 | 22. Add an open guitar case on the ground in front of him.         |  |     |
| 124 | 23. Add a price tag to one of the flower pots.                     |  |     |
| 125 | 24. Remove the plant pots from the row.                            |  |     |
|     | <b>C. Supervised Data Generation</b>                               |  | 126 |
|     | Training prompts were generated using large language               |  | 127 |
|     | models to cover three semantic domains: color, position,           |  | 128 |
|     | and object count. For each domain, 10k candidate prompts           |  | 129 |
|     | were generated using multiple models (BLIP3o, SD3, and             |  | 130 |
|     | DEV). To ensure high-quality and semantically accurate             |  | 131 |
|     | prompts, all outputs were manually reviewed and filtered,          |  | 132 |
|     | retaining only those that correctly captured the intended          |  | 133 |
|     | attributes. Among the models tested, BLIP3o, SD3, and              |  | 134 |
|     | DEV consistently produced the most reliable and coherent           |  | 135 |
|     | prompts, showing strong consistency in describing colors,          |  | 136 |
|     | spatial relations, and object counts, whereas other models         |  | 137 |
|     | occasionally produced ambiguous or incomplete descrip-             |  | 138 |
|     | tions.                                                             |  | 139 |
|     | Rather than using a separate testing set, the supervised           |  | 140 |
|     | dataset is used to guide the generator itself: for each val-       |  | 141 |
|     | idated prompt, the model generates multiple images using           |  | 142 |
|     | different random seeds. This self-generation process, super-       |  | 143 |
|     | vised by the validated dataset, provides diverse latent rep-       |  | 144 |
|     | resentations and ensures coverage of the semantic domains,         |  | 145 |
|     | without requiring an explicit test split. The resulting dataset    |  | 146 |
|     | thus serves both as a source of training supervision and a         |  | 147 |
|     | reference for controlled evaluation during model develop-          |  | 148 |
|     | ment.                                                              |  | 149 |
|     | <b>D. Implementation and Reproducibility</b>                       |  | 150 |
|     | <b>D.1. Training Configuration</b>                                 |  | 151 |
|     | We train using AdamW with a learning rate of $1 \times 10^{-4}$ ,  |  | 152 |
|     | batch size 8 per GPU, PPO clipping ratio 0.2, gradient clip-       |  | 153 |
|     | ping 1.0, and a cosine learning rate schedule. Experiments         |  | 154 |
|     | are conducted on H100 80GB GPUs.                                   |  | 155 |
|     | <b>D.2. Hyperparameters</b>                                        |  | 156 |
|     | The URC transformer has 6 layers, $R_\phi$ has 4 layers, em-       |  | 157 |
|     | bedding size 1024, residual scale $\alpha = 0.8$ , and task-weight |  | 158 |
|     | modulation range $[0.5, 2.0]$ .                                    |  | 159 |
|     | <b>E. Additional Experiments</b>                                   |  | 160 |
|     | This section provides additional quantitative experiments          |  | 161 |
|     | complementing the analyses in the main paper.                      |  | 162 |
|     | <b>E.1. Process-Level Validation and Attribution</b>               |  | 163 |
|     | <b>Causal Evidence.</b> In Sec. 4.3.1, we demonstrate that im-     |  | 164 |
|     | provements are directly driven by our formulation via three        |  | 165 |
|     | validation tests: (i) <b>Spatial Causal Link:</b> Masking high-    |  | 166 |
|     | activation LAM regions leads to a 6.3% drop in CLIP-               |  | 167 |
|     | Score, proving these regions are where alignment is fixed;         |  | 168 |
|     | (ii) <b>Signal-to-Gain Correlation:</b> A Spearman correlation     |  | 169 |
|     | of $\rho=0.71$ between token contribution magnitudes and re-       |  | 170 |
|     | ward gains confirms that latent rewards directly drive the         |  | 171 |
|     | correction; (iii) <b>Consistency:</b> A Jaccard similarity of 0.68 |  | 172 |

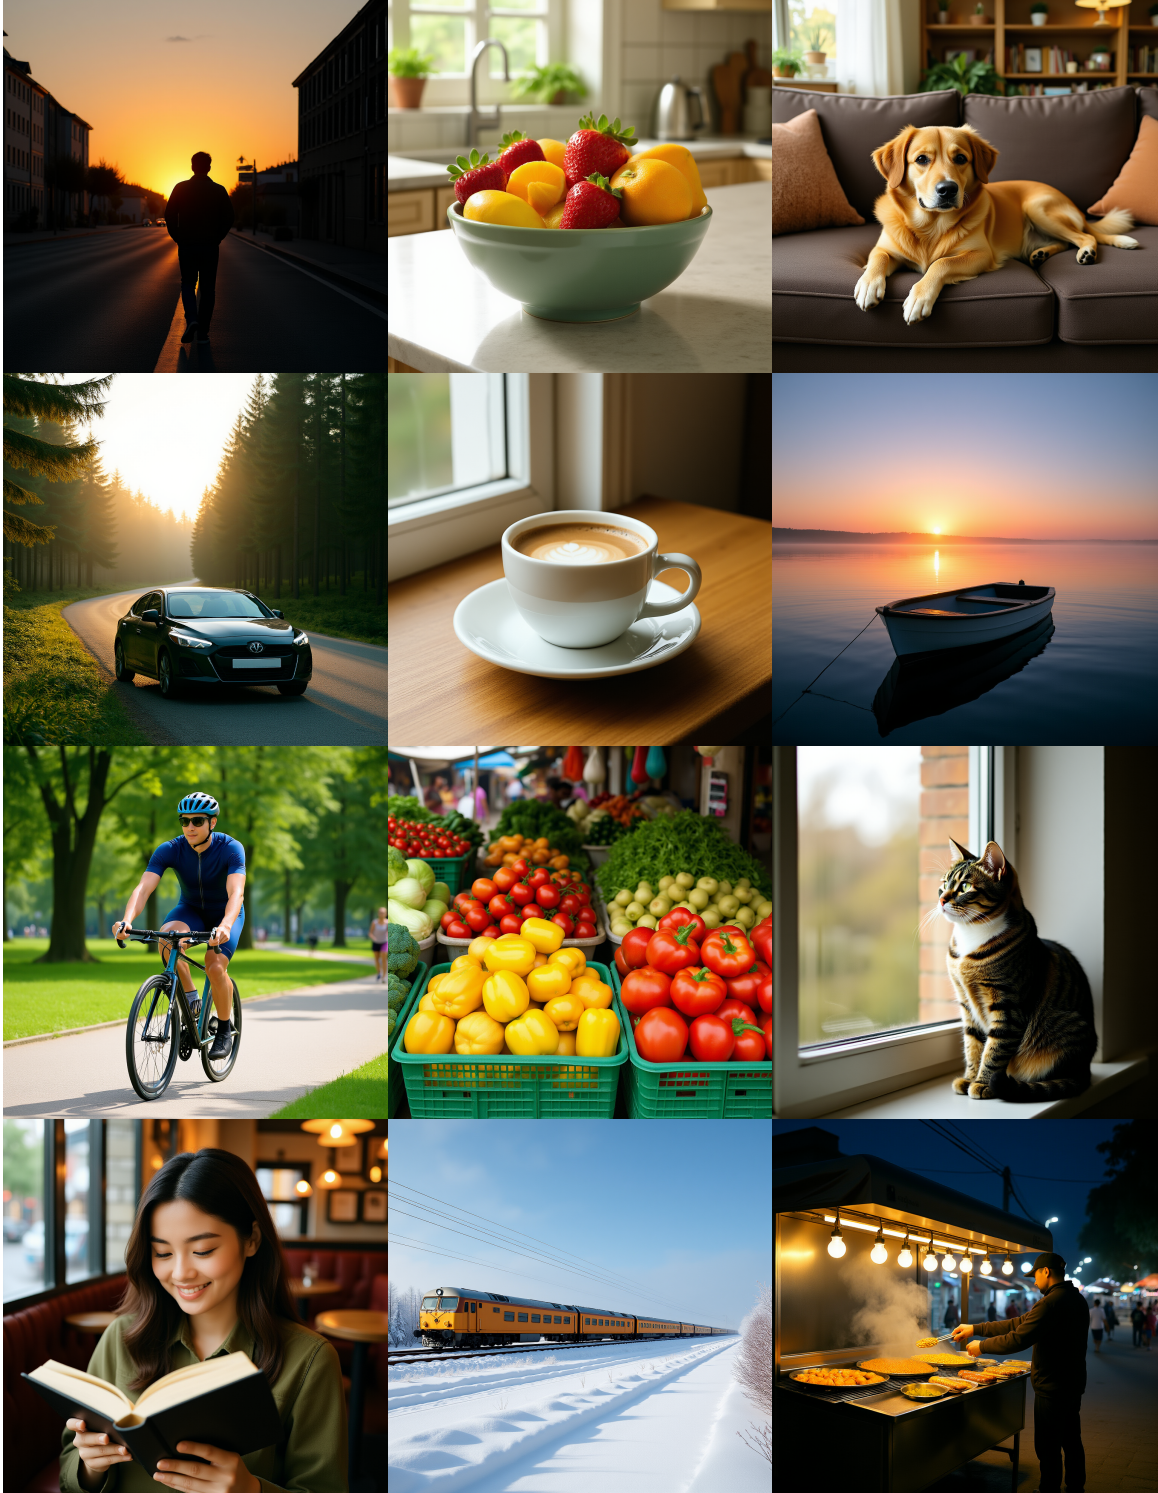

Figure 1. Qualitative results for text to image generation.

173 across prompts shows stable, predictable correction pat-  
174 terns.

175 **Incremental Dynamics.** To quantify process-level dynam-  
176 ics, we analyzed semantic trajectories on a subset of 500

prompts from GenEval by sampling latent sub-rewards at 177  
irregular intervals through our differentiable projector  $R_{\Phi}$ . 178  
We observe a 26.34% average reward increase between de- 179  
noising steps 7 and 38, with a high Pearson correlation 180

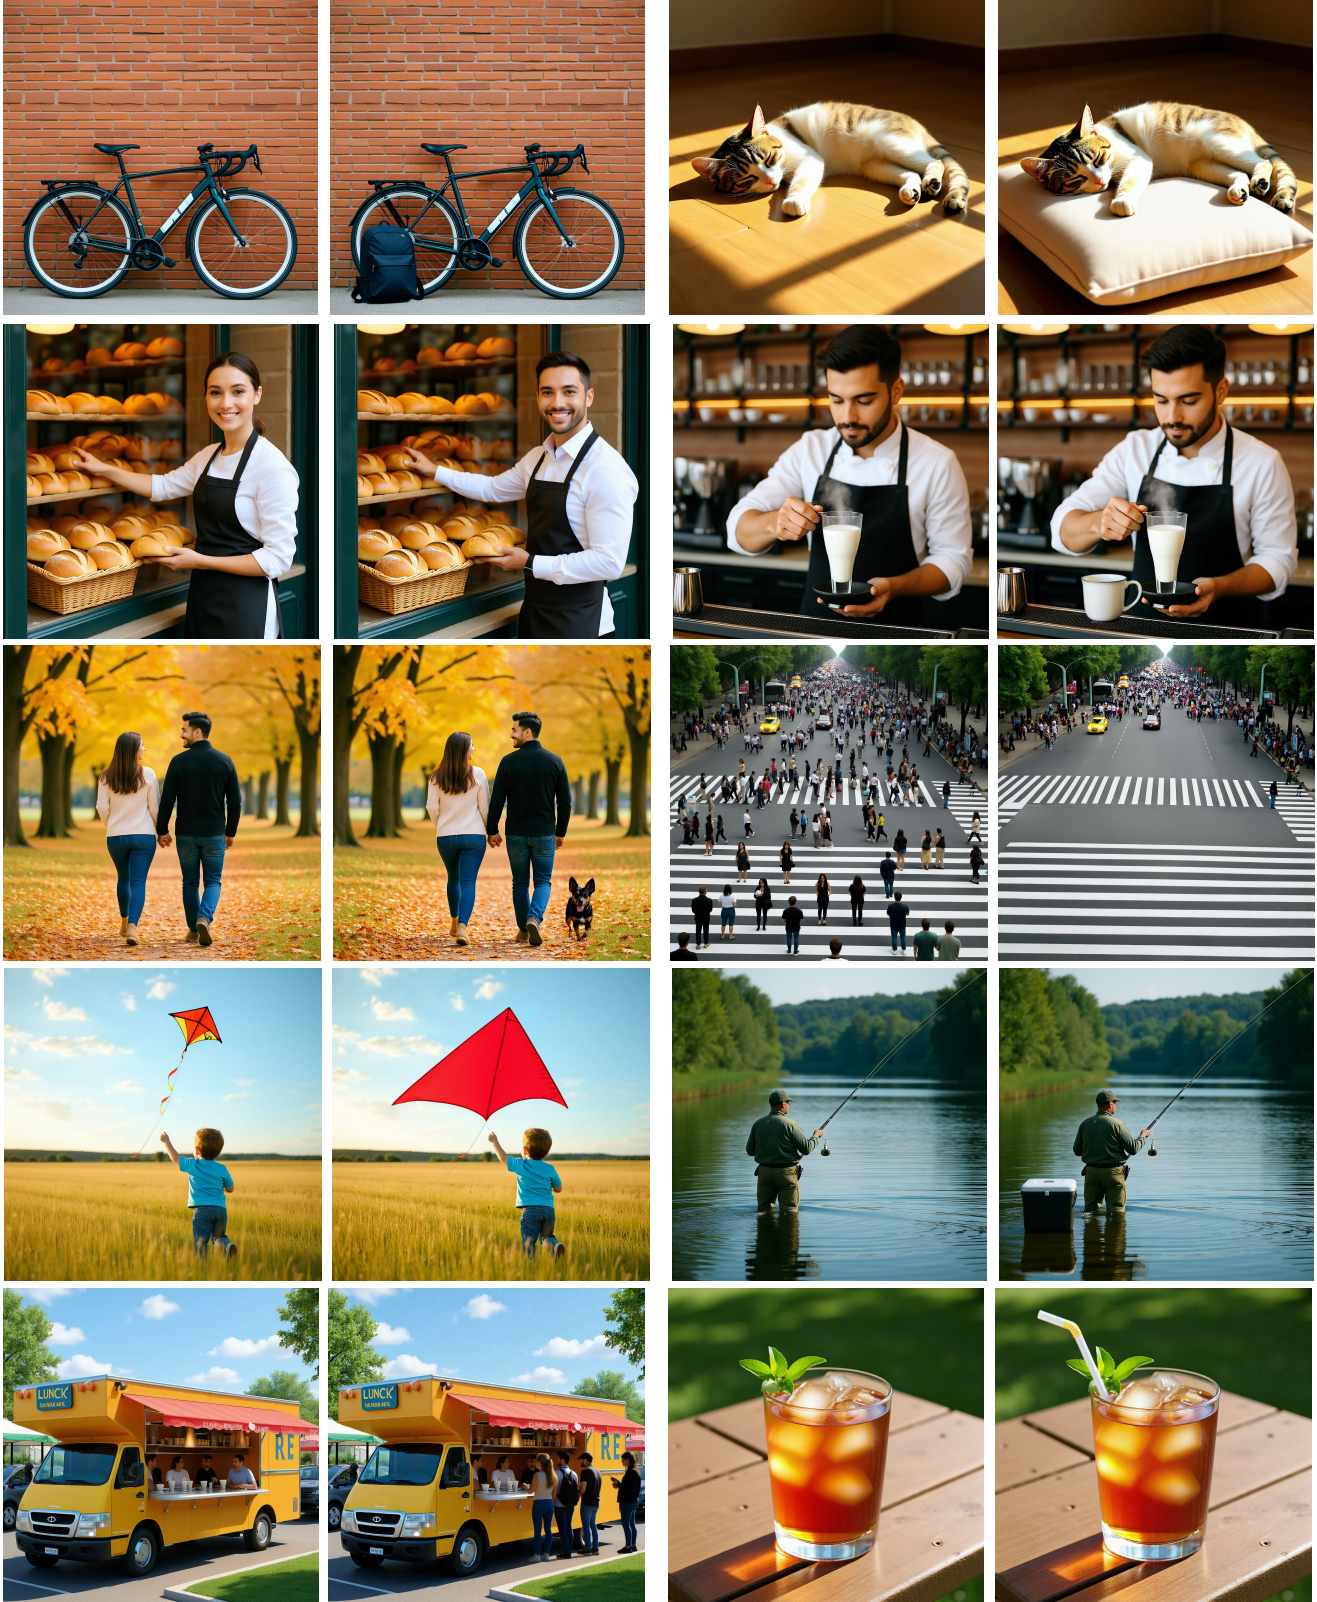

Figure 2. Qualitative editing results-1.

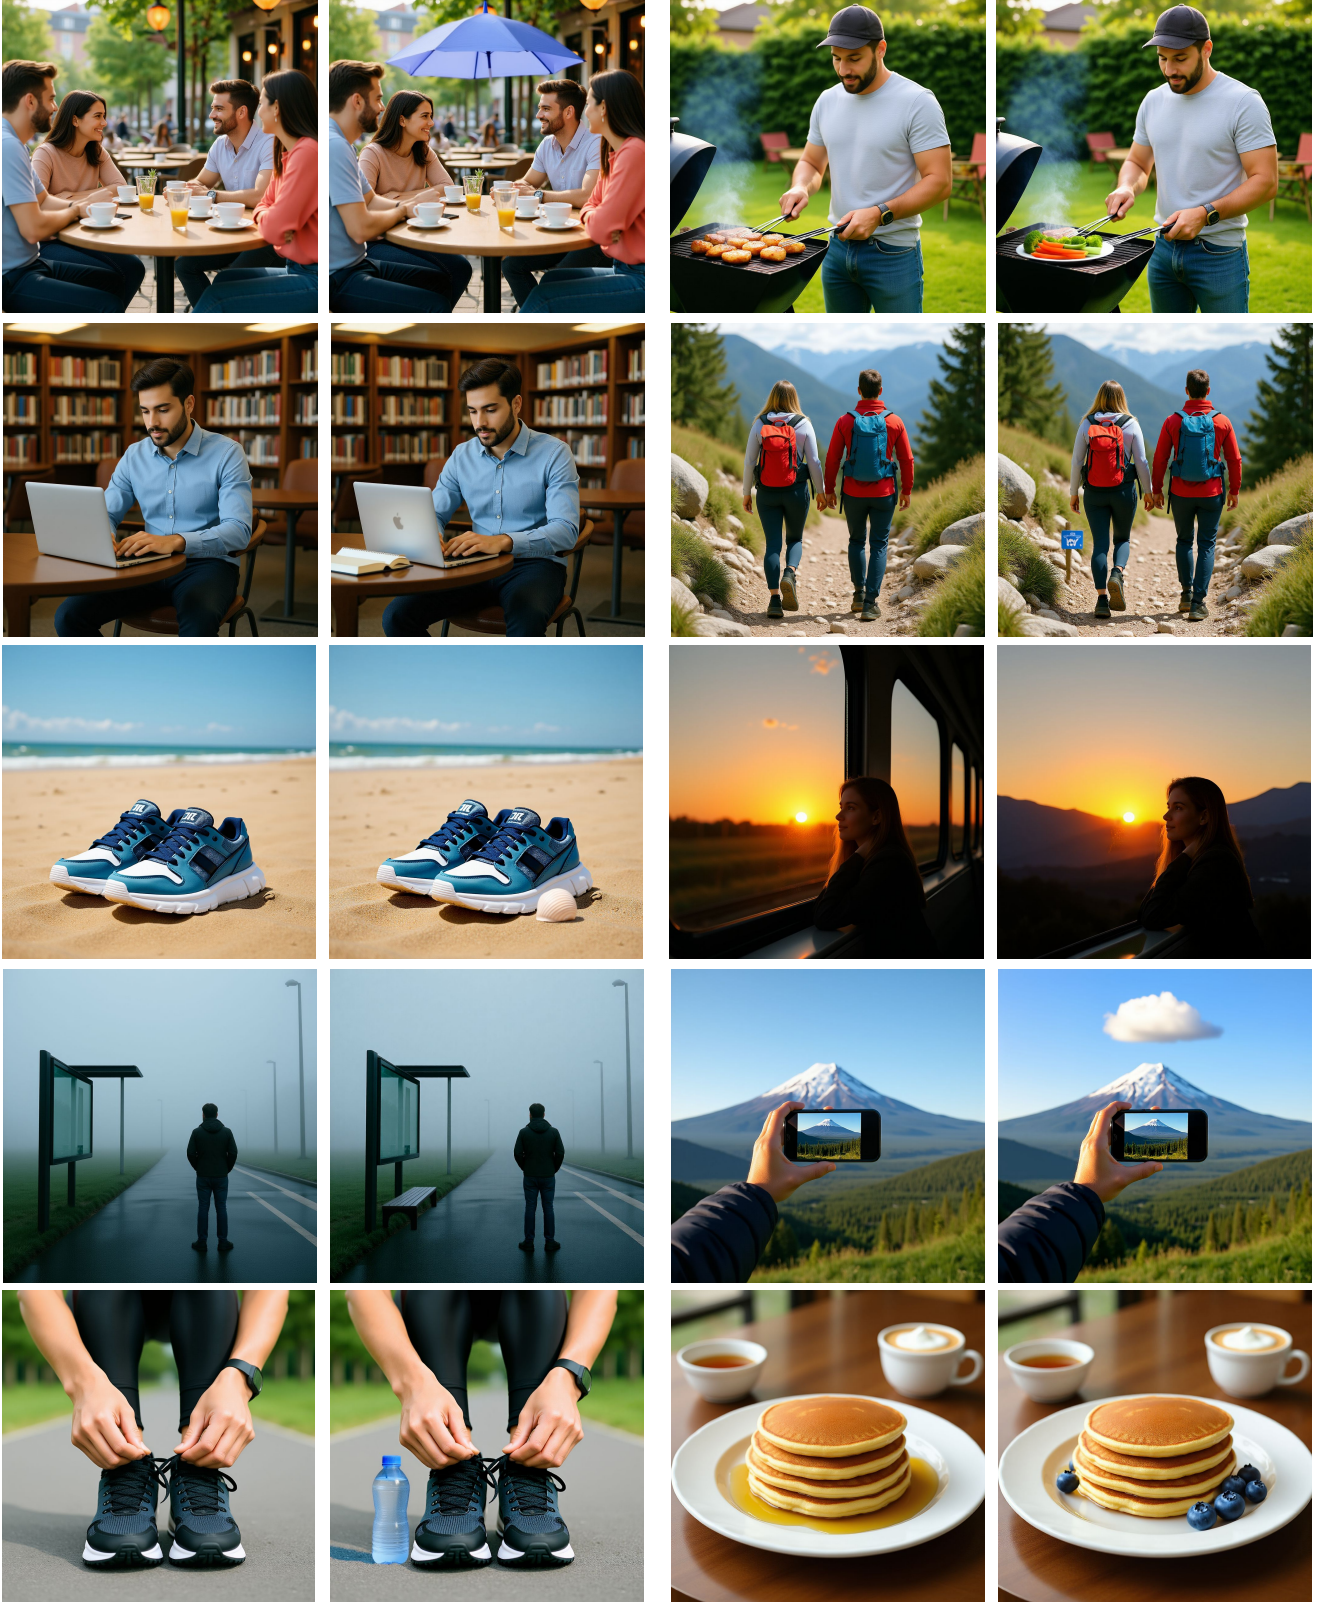

Figure 3. Qualitative editing results-2.

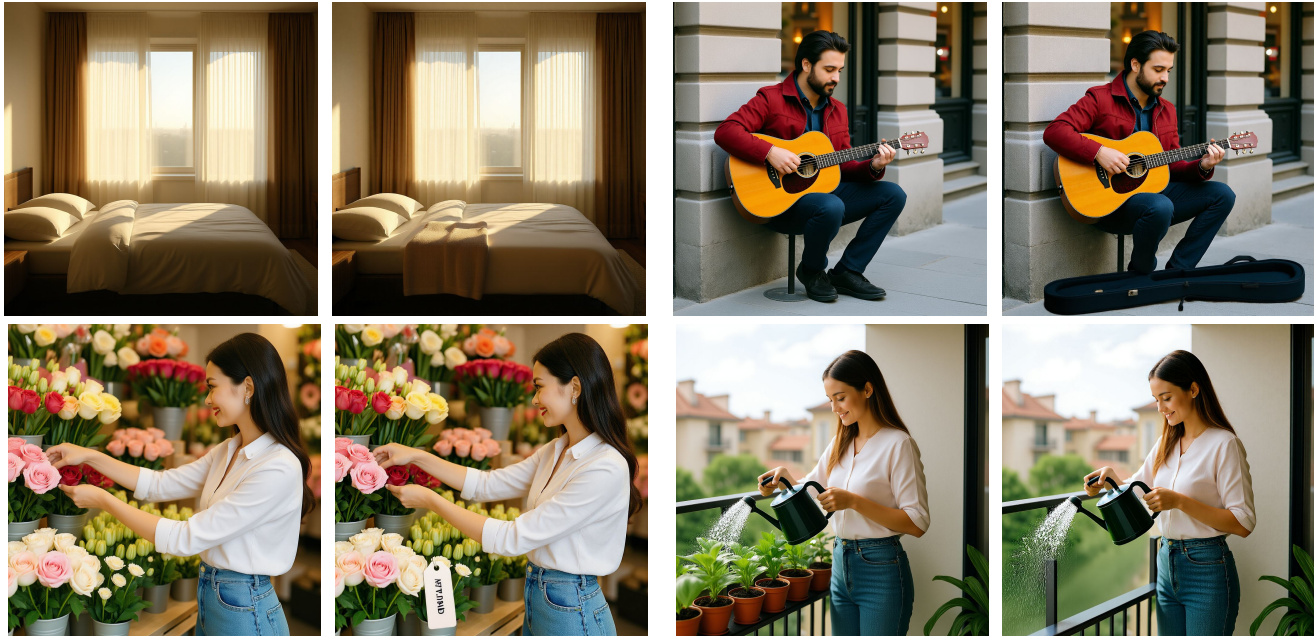

Figure 4. Qualitative editing results-3.

Table 1. Ablation study of reward components.

| Method Variant       | GenEval (%)   | DPG-Bench (%) |
|----------------------|---------------|---------------|
| Full xLARD Framework | <b>81.24</b>  | <b>86.72</b>  |
| w/o Counting Reward  | 76.45 (−4.79) | 83.10 (−3.62) |
| w/o Color Reward     | 78.92 (−2.32) | 84.55 (−2.17) |
| w/o Position Reward  | 79.15 (−2.09) | 84.88 (−1.84) |

( $r=0.827$ ) between these incremental gains and final performance. Specifically, Counting rewards stabilize rapidly within the first 18 steps to establish structural layout, while Color and Position rewards provide continuous refinement through step 43. This temporal analysis confirms that xLARD performs active, multi-stage steering throughout the generative process rather than a singular post-hoc correction.

## E.2. Sub-Reward Analysis and Ablation

Our modular design is a deliberate choice to ensure interpretability and avoid the black-box nature of aggregate rewards. While the sub-rewards are specific, they address the most frequent failure modes in T2I models and provide a framework that is easily extendable to other attributes. The ablation of reward roles is reported in Table 1.

## E.3. Comparison with Plug-and-Play Guidance Baseline

For latent editing comparisons, we include a Plug-and-Play Guidance (PPGD) baseline adapted to our architecture; most existing latent editing methods are U-Net-based

and do not generalize to unified multimodal transformers. On GenEval and DPG-Bench, PPGD achieves 77.04% and 83.54%, below our method (81.29% and 86.45%). These results provide additional comparative context against recent SOTA techniques.

## E.4. Confidence-Based Modulation (CMD) Analysis

The Confidence Head  $\omega$  is a lightweight MLP trained via PPO to predict sub-reward reliability. Rather than static weights, it acts as a dynamic gating mechanism to suppress irrelevant signals. Our analysis shows removing CMD causes a 3.3% GenEval drop due to “gradient interference,” where unmodulated rewards compete for latent updates.

## E.5. Additional Technical Details

**Reward Projection.** The differentiable projector  $R_\phi$  does not backpropagate through the decoder. Instead, it is trained via supervised regression to approximate non-differentiable image-level rewards, enabling stable gradient flow entirely within latent space during corrector optimization.

**Corrector Behavior.** The corrector  $\Delta_\theta$  is explicitly constrained to produce small-magnitude residual updates via the scaling factor  $\alpha$  and PPO regularization, ensuring localized semantic refinement rather than latent overwriting or re-generation.

**Counting Implementation.** Connected-component analysis is applied after adaptive thresholding and morphological filtering of token attention maps, which removes spurious

228 activations and yields stable object-count estimates across  
229 prompts.

### 230 **E.6. Runtime and Memory**

231 Training takes 4 h/epoch, inference matches base-generator  
232 runtime as mentioned in the paper discussion, and peak  
233 memory is approximately 72 GB at batch size 8. Reference-  
234 prompt construction details are provided in the supplemen-  
235 tary material.
